# Supplementary material for: Reference Values for Isometric, Dynamic, and Asymmetry Leg Extension Strength in Patients with Multiple Sclerosis
Source: MDPI journal article supplement (doi:10.3390/ijerph17218083), 2020-11-02
Supplement: s1 [file s1]

Table S2: Force variables by neurological disability level and gender.

|                | Male     |                       |      |      |              |        |       |      |            |                       |       |      | P     |
|----------------|----------|-----------------------|------|------|--------------|--------|-------|------|------------|-----------------------|-------|------|-------|
|                | Mild (L) |                       |      |      | Moderate (M) |        |       |      | Severe (S) |                       |       |      |       |
|                | Mean     | SD                    | Max. | Min. | Mean         | SD     | Max.  | Min. | Mean       | SD                    | Max.  | Min. |       |
| 1RM Bil.       | 98.9     | ± 17.7 <sup>S</sup>   | 130  | 67   | 87.6         | ± 27.9 | 160   | 49   | 74.4       | ± 32.5                | 150   | 16   | 0.015 |
| 1RM Righth     | 51.9     | ± 15                  | 77   | 26   | 47.9         | ± 18.6 | 90    | 15   | 37.1       | ± 15.8                | 55    | 14   | 0.128 |
| 1RM Left       | 55.3     | ± 13 <sup>S</sup>     | 85   | 36   | 52.2         | ± 20.0 | 90    | 28   | 33.7       | ± 13.7                | 55    | 21   | 0.016 |
| IMVIC Bil.     | 115      | ± 27                  | 179  | 76.1 | 101.1        | ± 29.4 | 176.1 | 56.7 | 7.8        | ± 28.7 <sup>L,M</sup> | 161.3 | 24.8 | 0.000 |
| MVIC Righth    | 54.2     | ± 15                  | 102  | 26.2 | 47           | ± 13.3 | 87    | 22.1 | 35.4       | ± 15.3 <sup>L,M</sup> | 65.5  | 10   | 0.000 |
| MVIC Left      | 54.6     | ± 13                  | 81.6 | 30.5 | 48.9         | ± 16.9 | 89.1  | 25   | 35.6       | ± 14.1 <sup>L,M</sup> | 64.7  | 4.5  | 0.000 |
| Asymmetry 1RM  | 11.5     | ± 12.3                | 37.3 | 0    | 12.6         | ± 16.1 | 46.4  | 0    | 8.7        | ± 21.6                | 57.6  | 0    | 0.875 |
| Asymmetry MVIC | 17.9     | ± 11.0                | 41.8 | 0.7  | 17.8         | ± 13.2 | 44.6  | 0.5  | 28.1       | ± 22.9                | 74.3  | 0.2  | 0.050 |
|                |          |                       |      |      |              |        |       |      |            |                       |       |      |       |
|                | Female   |                       |      |      |              |        |       |      |            |                       |       |      | P     |
|                | Mild (L) |                       |      |      | Moderate (M) |        |       |      | Severe (S) |                       |       |      |       |
|                | Mean     | SD                    | Max. | Min. | Mean         | SD     | Max.  | Min. | Mean       | SD                    | Max.  | Min. |       |
| 1RM Bil.       | 67.3     | ± 19.4 <sup>M,S</sup> | 115  | 23   | 54.5         | ± 17.3 | 110   | 15   | 46         | ± 23.1                | 95    | 6    | 0.000 |
| 1RM Righth     | 31.6     | ± 9.9 <sup>S</sup>    | 59   | 18   | 26.3         | ± 10.9 | 50    | 8    | 22         | ± 6                   | 28    | 13   | 0.019 |
| 1RM Left       | 31.9     | ± 12                  | 55   | 0.0  | 25.7         | ± 9.9  | 45    | 10   | 25.3       | ± 7.1                 | 36    | 17   | 0.044 |
| IMVIC Bil.     | 74.5     | ± 17.4 <sup>M,S</sup> | 117  | 40   | 56.7         | ± 14.1 | 94.7  | 16.3 | 49         | ± 19.4                | 104.8 | 19.2 | 0.000 |
| MVIC Righth    | 36.3     | ± 8.2 <sup>M,S</sup>  | 62.1 | 22.4 | 27.9         | ± 7.4  | 45.8  | 11.1 | 23.5       | ± 10.5                | 47.1  | 5.4  | 0.000 |
| MVIC Left      | 35.3     | ± 9.5 <sup>M,S</sup>  | 56.5 | 12   | 27.5         | ± 8.6  | 51    | 10   | 23.9       | ± 10.8                | 55.3  | 9    | 0.000 |
| Asymmetry 1RM  | 7.1      | ± 9.7                 | 34.0 | 0.0  | 10.3         | ± 20.3 | 74.2  | 0.0  | 18.3       | ± 15.9                | 36    | 0.0  | 0.184 |
| Asymmetry MVIC | 12.0     | ± 11.8 <sup>M,S</sup> | 62.5 | 0.0  | 20.6         | ± 15.6 | 67.7  | 0.0  | 24.6       | ± 14.3                | 57.8  | 0.7  | 0.000 |

The strength is expressed in kilogram\_force (Kg\_f). MVIC= maximal voluntary isometric contraction; 1RM= one repetition maximum; Bil.= bilateral; asymmetry is indicated in %; SD = standard deviation; Max = maximum value; Min = minimum value. Letters (L, M, S) indicate significant differences between groups. asymmetry is indicated in percentage values.
