# Supplementary material for: Reference Values for Isometric, Dynamic, and Asymmetry Leg Extension Strength in Patients with Multiple Sclerosis
Source: MDPI journal article supplement (doi:10.3390/ijerph17218083), 2020-11-02
Supplement: s1 [file s1]

Table S3: Quartiles of force variables of sample by type of Multiple Sclerosis and gender.

|                | Male |      |       |      |       |       |      |      |       | Female |      |      |      |      |      |      |      |      |
|----------------|------|------|-------|------|-------|-------|------|------|-------|--------|------|------|------|------|------|------|------|------|
|                | PP   |      |       | RR   |       |       | SP   |      |       | PP     |      |      | RR   |      |      | SP   |      |      |
|                | Q1   | Q2   | Q3    | Q1   | Q2    | Q3    | Q1   | Q2   | Q3    | Q1     | Q2   | Q3   | Q1   | Q2   | Q3   | Q1   | Q2   | Q3   |
| 1RM Bil.       | 63.0 | 87.5 | 113.0 | 83.2 | 90.0  | 114.0 | 53.5 | 75.0 | 97.5  | 42.0   | 55.0 | 67.0 | 47.3 | 59.5 | 75.0 | 42.3 | 47.0 | 63.2 |
| 1RM Righth     | 31.0 | 41.0 | 52.0  | 33.0 | 48.0  | 58.2  | 45.5 | 50.0 | 62.0  | 16.0   | 20.0 | 27.0 | 21.0 | 28.0 | 38.0 | 22.0 | 25.0 | 26.0 |
| 1RM Left       | 28.7 | 47.5 | 64.0  | 35.2 | 49.5  | 60.2  | 46.0 | 50.0 | 62.0  | 17.0   | 29.0 | 36.0 | 22.0 | 29.0 | 38.0 | 16.7 | 20.0 | 29.5 |
| IMVIC Bil.     | 75.4 | 96.0 | 114.0 | 86.4 | 100.5 | 128.0 | 54.6 | 82.0 | 108.2 | 46.0   | 55.6 | 65.1 | 53.7 | 66.1 | 77.3 | 40.0 | 50.2 | 64.7 |
| MVIC Righth    | 41.0 | 45.0 | 51.4  | 39.5 | 46.7  | 57.9  | 24.4 | 37.3 | 51.1  | 18.6   | 27.3 | 32.2 | 27.2 | 31.9 | 39.7 | 20.0 | 28.0 | 33.0 |
| MVIC Left      | 37.3 | 54.0 | 61.0  | 35.1 | 49.1  | 60.9  | 27.4 | 39.3 | 51.8  | 21.7   | 27.1 | 30.5 | 26.0 | 31.5 | 39.7 | 17.8 | 24.0 | 31.1 |
| Asymmetry 1RM  | 0.0  | 16   | 29.1  | 0.0  | 1.8   | 17.9  | 0.0  | 3.9  | 9.1   | 5.4    | 22.9 | 36   | 0.0  | 0.0  | 10.8 | 0.0  | 8.3  | 14.7 |
| Asymmetry MVIC | 2.3  | 24.2 | 31.8  | 7.1  | 14.9  | 25    | 11.8 | 26.6 | 38.5  | 10     | 22.8 | 31.1 | 4.9  | 10.2 | 20.9 | 11.6 | 26.2 | 35.1 |

Table S4: Quartiles of force variables of sample by EDSS degree and gender.

|                | Male |       |       |          |       |       |        |      |      | Female |      |      |          |      |      |        |      |      |
|----------------|------|-------|-------|----------|-------|-------|--------|------|------|--------|------|------|----------|------|------|--------|------|------|
|                | Mild |       |       | Moderate |       |       | Severe |      |      | Mild   |      |      | Moderate |      |      | Severe |      |      |
|                | Q1   | Q2    | Q3    | Q1       | Q2    | Q3    | Q1     | Q2   | Q3   | Q1     | Q2   | Q3   | Q1       | Q2   | Q3   | Q1     | Q2   | Q3   |
| 1RM Bil.       | 85.0 | 90.0  | 115.5 | 66.5     | 82.0  | 112.5 | 51.7   | 75.5 | 92.5 | 55.5   | 64.0 | 80.0 | 43.0     | 50.0 | 67.0 | 28.0   | 47.0 | 61.0 |
| 1RM Righth     | 42.2 | 52.5  | 66.2  | 37.2     | 47.0  | 58.0  | 22.7   | 38.0 | 52.2 | 25.0   | 28.0 | 38.0 | 19.0     | 21.5 | 35.0 | 16.0   | 25.0 | 26.7 |
| 1RM Left       | 45.2 | 53.5  | 66.2  | 30.2     | 52.5  | 65.7  | 21.0   | 31.0 | 50.0 | 25.0   | 32.0 | 37.7 | 18.7     | 23.5 | 33.5 | 18.7   | 25.0 | 32.5 |
| IMVIC Bil.     | 94.5 | 109.4 | 129.0 | 74.0     | 102.5 | 128.8 | 55.5   | 80.1 | 95.5 | 65.0   | 72.0 | 86.7 | 45.9     | 56.4 | 66.3 | 32.7   | 50.3 | 61.1 |
| MVIC Righth    | 42.2 | 51.0  | 66.0  | 39.0     | 46.2  | 53.7  | 23.5   | 36.0 | 44.0 | 30.4   | 34.5 | 42.6 | 23.0     | 28.4 | 32.0 | 14.6   | 21.5 | 29.3 |
| MVIC Left      | 46.5 | 52.8  | 61.0  | 33.3     | 50.0  | 62.4  | 27.9   | 38.7 | 42.9 | 28.1   | 33.0 | 42.3 | 20.6     | 26.7 | 32.9 | 24.3   | 25.8 | 29.3 |
| Asymmetry 1RM  | 0.0  | 9.8   | 21.2  | 0.0      | 4.6   | 26.5  | 0      | 1.5  | 3.6  | 0.0    | 4.8  | 10.7 | 0.0      | 5.2  | 9.1  | 0.0    | 23.2 | 31.9 |
| Asymmetry MVIC | 8.8  | 16.8  | 26.2  | 5.4      | 15.5  | 28.1  | 7.8    | 25.1 | 44.4 | 4.4    | 7.3  | 18.8 | 7.8      | 17   | 30.6 | 14.8   | 25   | 32.3 |

The strength is expressed in kilogram\_force (Kg\_f). MVIC= maximal voluntary isometric contraction; 1RM= one repetition maximum; Bil.= bilateral; asymmetry is indicated in %; SD = standard deviation; Max = maximum value; Min = minimum value. PP = Primary-Progressive; RR = Relapsing-Remitting; SP = Secondary-Progressive. Asymmetry is indicated in percentage values.
