# Supplementary material for: Reference Values for Isometric, Dynamic, and Asymmetry Leg Extension Strength in Patients with Multiple Sclerosis
Source: MDPI journal article supplement (doi:10.3390/ijerph17218083), 2020-11-02
Supplement: s1 [file s1]

Table S1: Force variables by type of Multiple Sclerosis and gender.

| Male             |        |        |       |      |        |                     |       |      |        |        |       |      |       |
|------------------|--------|--------|-------|------|--------|---------------------|-------|------|--------|--------|-------|------|-------|
|                  | PP (P) |        |       |      | RR (R) |                     |       |      | SP (S) |        |       |      | P     |
|                  | Mean   | SD     | Max.  | Min. | Mean   | SD                  | Max.  | Min. | Mean   | SD     | Max.  | Min. |       |
| 1RM Bil.         | 87.1   | ± 24.5 | 120.0 | 49.0 | 93.5   | ± 25,4 <sup>s</sup> | 160.0 | 33.0 | 74.2   | ± 28.5 | 130.0 | 16.0 | 0.028 |
| 1RM Righth       | 40.4   | ± 15.0 | 64.0  | 15.0 | 47.3   | ± 17.7              | 90.0  | 14.0 | 54.5   | ± 12.5 | 77.0  | 38.0 | 0.236 |
| 1RM Left         | 46.5   | ± 19.1 | 75.0  | 21.0 | 50.3   | ± 17.8              | 90.0  | 21.0 | 52.0   | ± 13.2 | 72.0  | 30.0 | 0.812 |
| Isometric Bil.   | 94.1   | ± 24.4 | 141.2 | 56.7 | 105.4  | ± 31,9 <sup>s</sup> | 182.6 | 46.0 | 82.8   | ± 31.3 | 144.7 | 24.8 | 0.006 |
| Isometric Righth | 45.8   | ± 11.6 | 65.8  | 22.5 | 48.9   | ± 16.9              | 101.6 | 10.0 | 39.5   | ± 16.5 | 70.4  | 17.5 | 0.084 |
| Isometric Left   | 49.8   | ± 14.1 | 66.4  | 25.7 | 49.9   | ± 17.9              | 108.6 | 9.0  | 39.3   | ± 17.0 | 71.0  | 4.5  | 0.057 |
| Asymmetry 1RM    | 17.1   | ± 17.6 | 46.4  | 0.0  | 10.6   | ± 15                | 57.6  | 0.0  | 5.4    | ± 10.9 | 29.0  | 0.0  | 0.328 |
| Asymmetry MVIC   | 19.8   | ± 14.4 | 39.5  | 0.8  | 18.0   | ± 14.8 <sup>s</sup> | 78.4  | 0.2  | 28.5   | ± 20.5 | 74.3  | 0.5  | 0.044 |

  

| Female           |        |        |       |      |        |                      |       |      |        |        |       |      |       |
|------------------|--------|--------|-------|------|--------|----------------------|-------|------|--------|--------|-------|------|-------|
|                  | PP (P) |        |       |      | RR (R) |                      |       |      | SP (S) |        |       |      | P     |
|                  | Mean   | SD     | Max.  | Min. | Mean   | SD                   | Max.  | Min. | Mean   | SD     | Max.  | Min. |       |
| 1RM Bil.         | 51.6   | ± 18.3 | 83.0  | 14.0 | 61.9   | ± 21,7 <sup>s</sup>  | 120.0 | 6.0  | 48.8   | ± 19.9 | 95.0  | 12.0 | 0.014 |
| 1RM Righth       | 22.0   | ± 7.9  | 35.0  | 13.0 | 29.8   | ± 11.4               | 59.0  | 8.0  | 24.9   | ± 4.4  | 35.0  | 18.0 | 0.086 |
| 1RM Left         | 27.9   | ± 8.8  | 37.0  | 16.0 | 30.6   | ± 11,3 <sup>s</sup>  | 55.0  | 0.0  | 21.7   | ± 8.3  | 36.0  | 10.0 | 0.037 |
| Isometric Bil.   | 56.2   | ± 16.3 | 102.6 | 27.9 | 67.2   | ± 19 <sup>s,P</sup>  | 117.0 | 19.5 | 51.1   | ± 18.2 | 104.8 | 16.3 | 0.000 |
| Isometric Righth | 26.2   | ± 7.4  | 37.9  | 13.5 | 33.3   | ± 9,9 <sup>s,P</sup> | 62.1  | 10.0 | 25.9   | ± 10.2 | 47.1  | 5.4  | 0.000 |
| Isometric Left   | 27.1   | ± 8.6  | 51.0  | 9.3  | 32.5   | ± 10,3 <sup>s</sup>  | 56.5  | 9.0  | 25.0   | ± 9.7  | 55.3  | 9.9  | 0.001 |
| Asymmetry 1RM    | 21.5   | ± 19.6 | 55.6  | 0.0  | 9.7    | ± 16.4               | 74.2  | 0.0  | 6.8    | ± 10.8 | 27.8  | 0.0  | 0.137 |
| Asymmetry MVIC   | 20.9   | ± 13.7 | 52.0  | 0.3  | 15.0   | ± 13.9 <sup>s</sup>  | 67.7  | 0.0  | 25.1   | ± 15.6 | 57.8  | 3.0  | 0.003 |

The strength is expressed in kilogram\_force (Kg\_f). MVIC= maximal voluntary isometric contraction; 1RM= one repetition maximum; Bil.= bilateral; asymmetry is indicated in %; SD = standard deviation; Max = maximum value; Min = minimum value. PP = Primary-Progressive; RR = Relapsing-Remitting; SP = Secondary-Progressive. Letters (P, R, S) indicate significant differences between groups. asymmetry is indicated in percentage values.
